# Supplementary material for: Cohesin and CTCF do not assemble TADs in Xenopus sperm and male pronuclei
Source: PubMed Central journal article supplement — Genome Res. 2023 Dec;33(12):2094–107. doi: 10.1101/gr.277865.123 (PMC10760524; doi:10.1101/gr.277865.123), 2023-12
Supplement: Supplemental_Fig_S2.pdf [file Supplemental_Fig_S2.pdf]

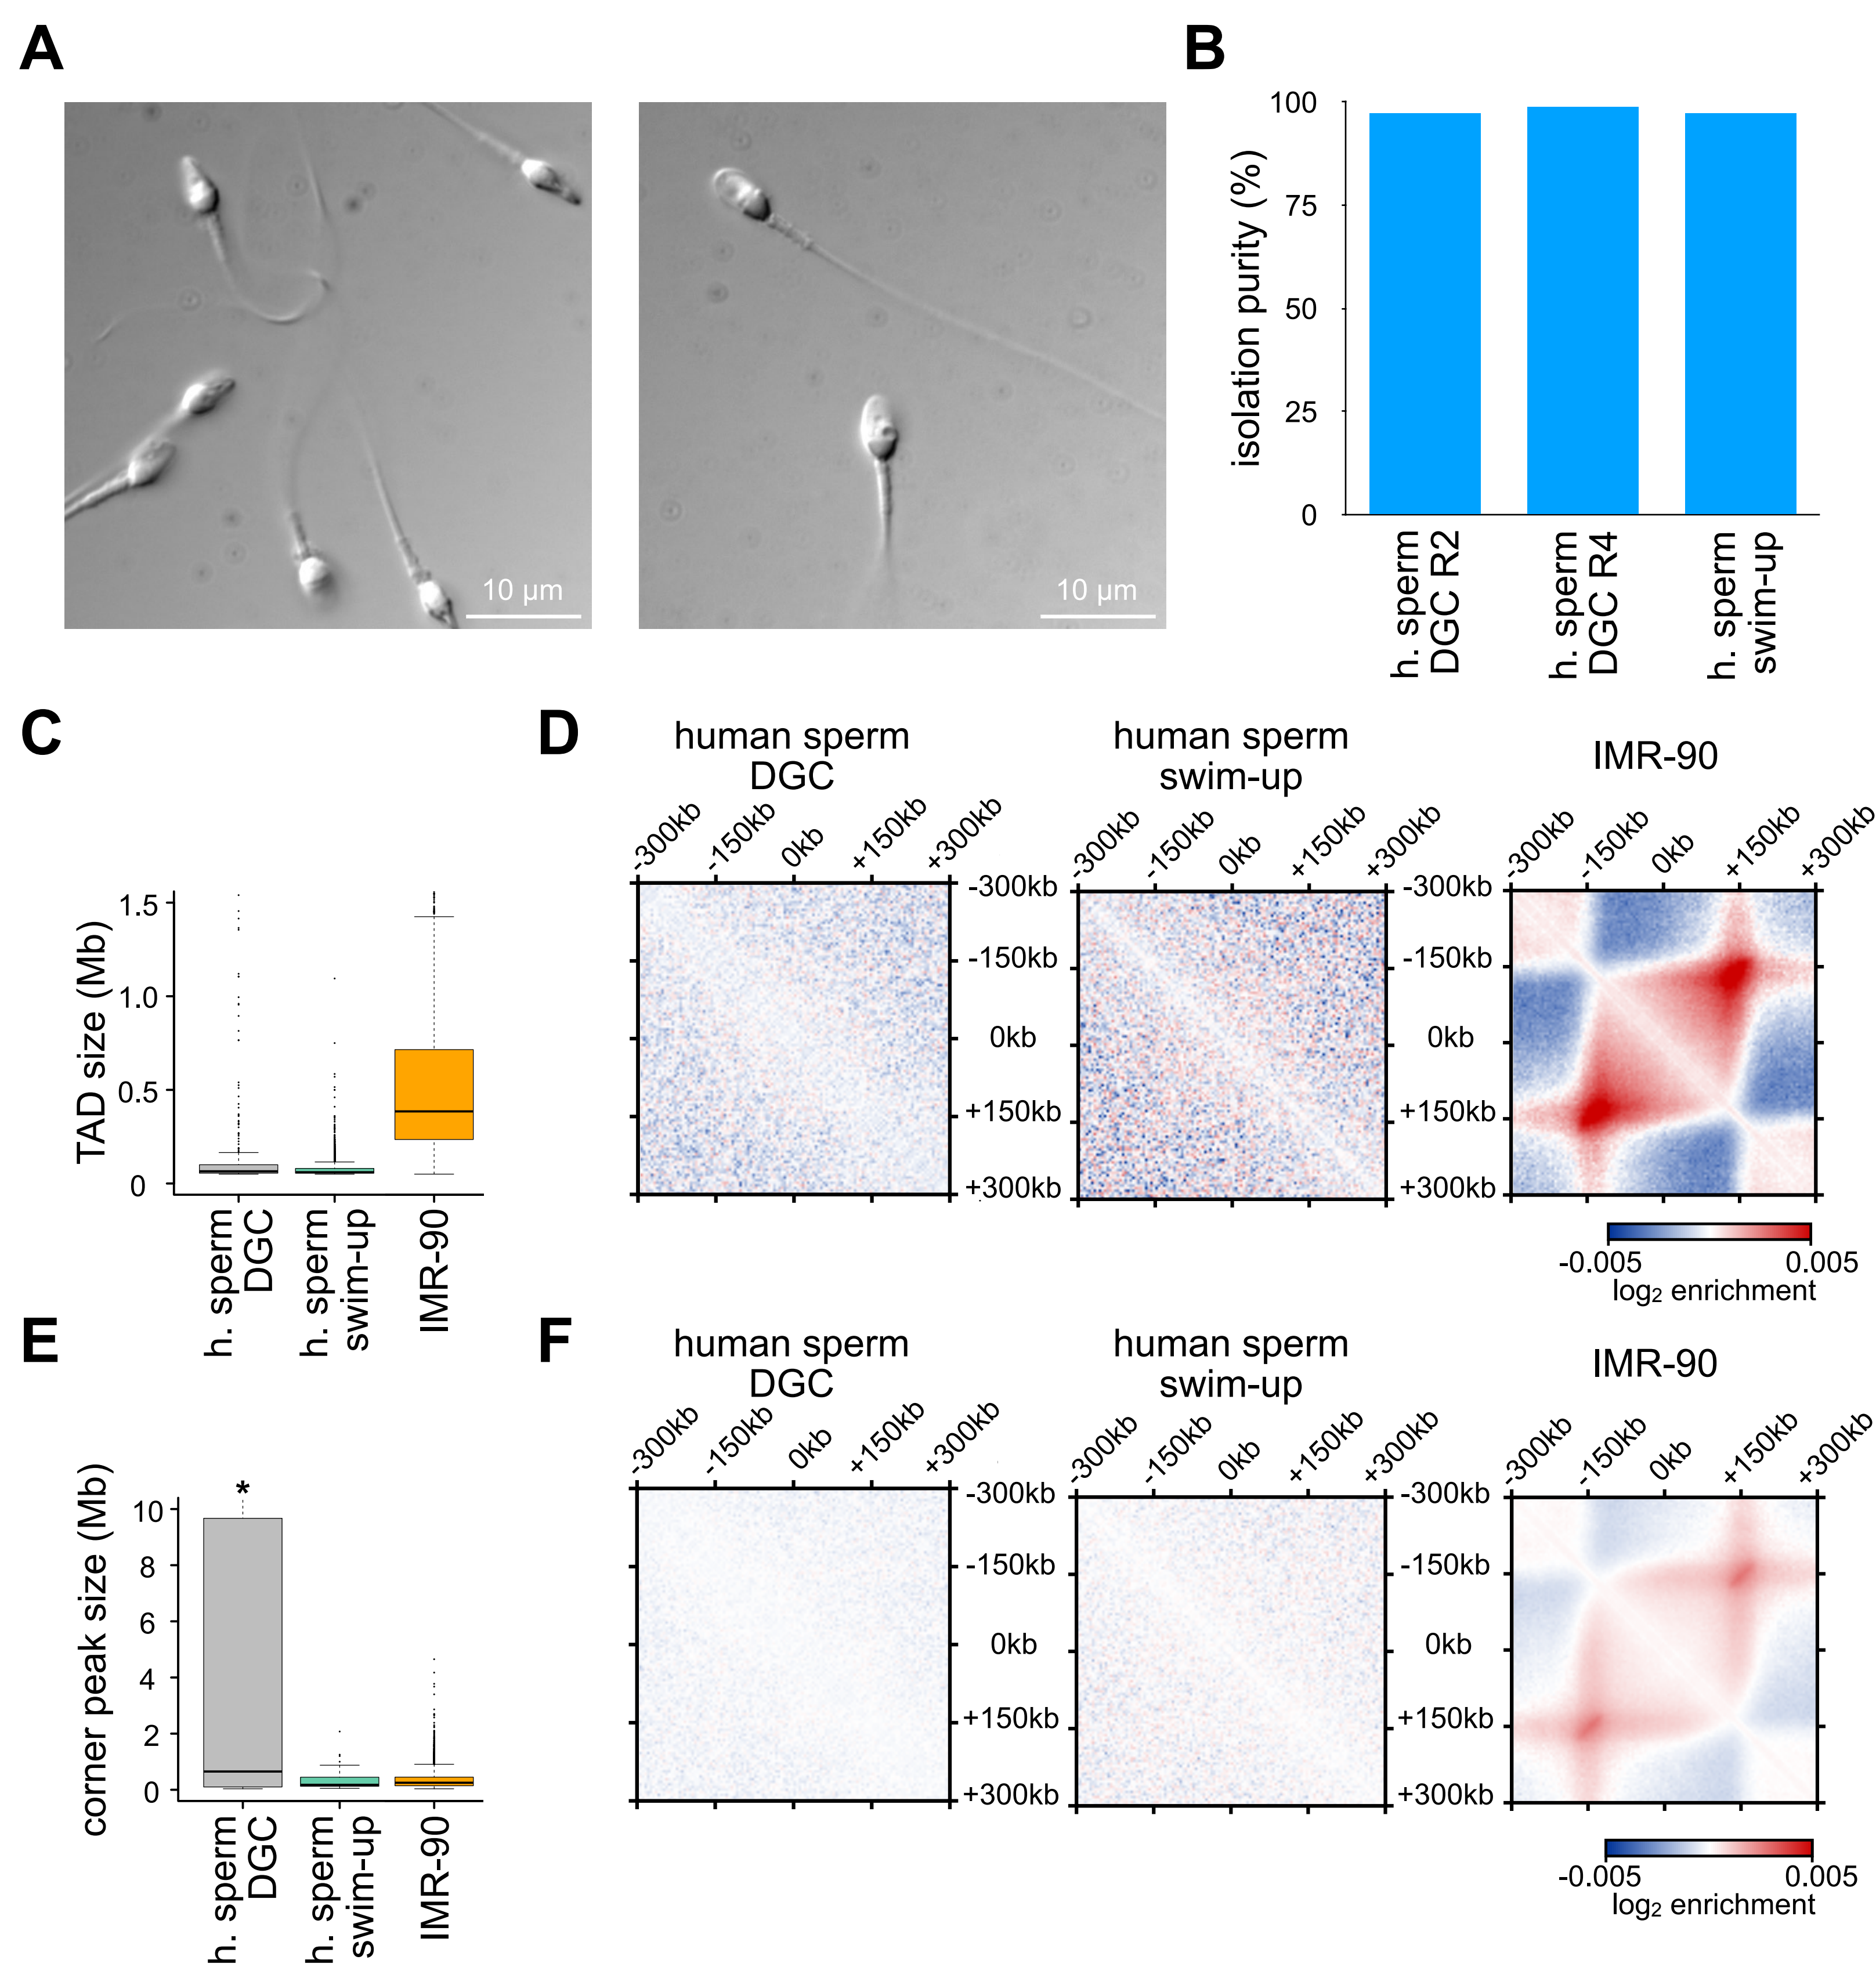

**Supplemental Figure S2.** The human sperm genome is organized without TADs and corner peaks. (A) Exemplary DIC microscopy of human sperm enriched for Hi-C analysis by density gradient centrifugation (DGC) (B) Purity of human sperm enriched for Hi-C analysis as determined by DIC microscopy. N=911 for human sperm DGC replicate 2, 1,700 for human sperm DGC replicate 4, 914 for human sperm swim-up (C) TAD size distribution for human sperm enriched by DGC and swim-up and for IMR-90 cells by Rao et al. 2014 (D) Aggregate contact frequencies (coverage and distance corrected) around the 352 250-350 kb long TADs called in IMR-90 cells, for the same samples as in (C) (E) Corner peak size distribution for the same samples as in (C). Asterisk indicates artifacts in corner peak calling (F) Aggregate contact frequencies (coverage and distance corrected) around the 789 250-350 kb long corner peaks called in IMR-90 cells, for the same samples as in (C)
