# Supplementary material for: Cohesin and CTCF do not assemble TADs in Xenopus sperm and male pronuclei
Source: PubMed Central journal article supplement — Genome Res. 2023 Dec;33(12):2094–107. doi: 10.1101/gr.277865.123 (PMC10760524; doi:10.1101/gr.277865.123), 2023-12
Supplement: Supplemental_Fig_S4.pdf [file Supplemental_Fig_S4.pdf]

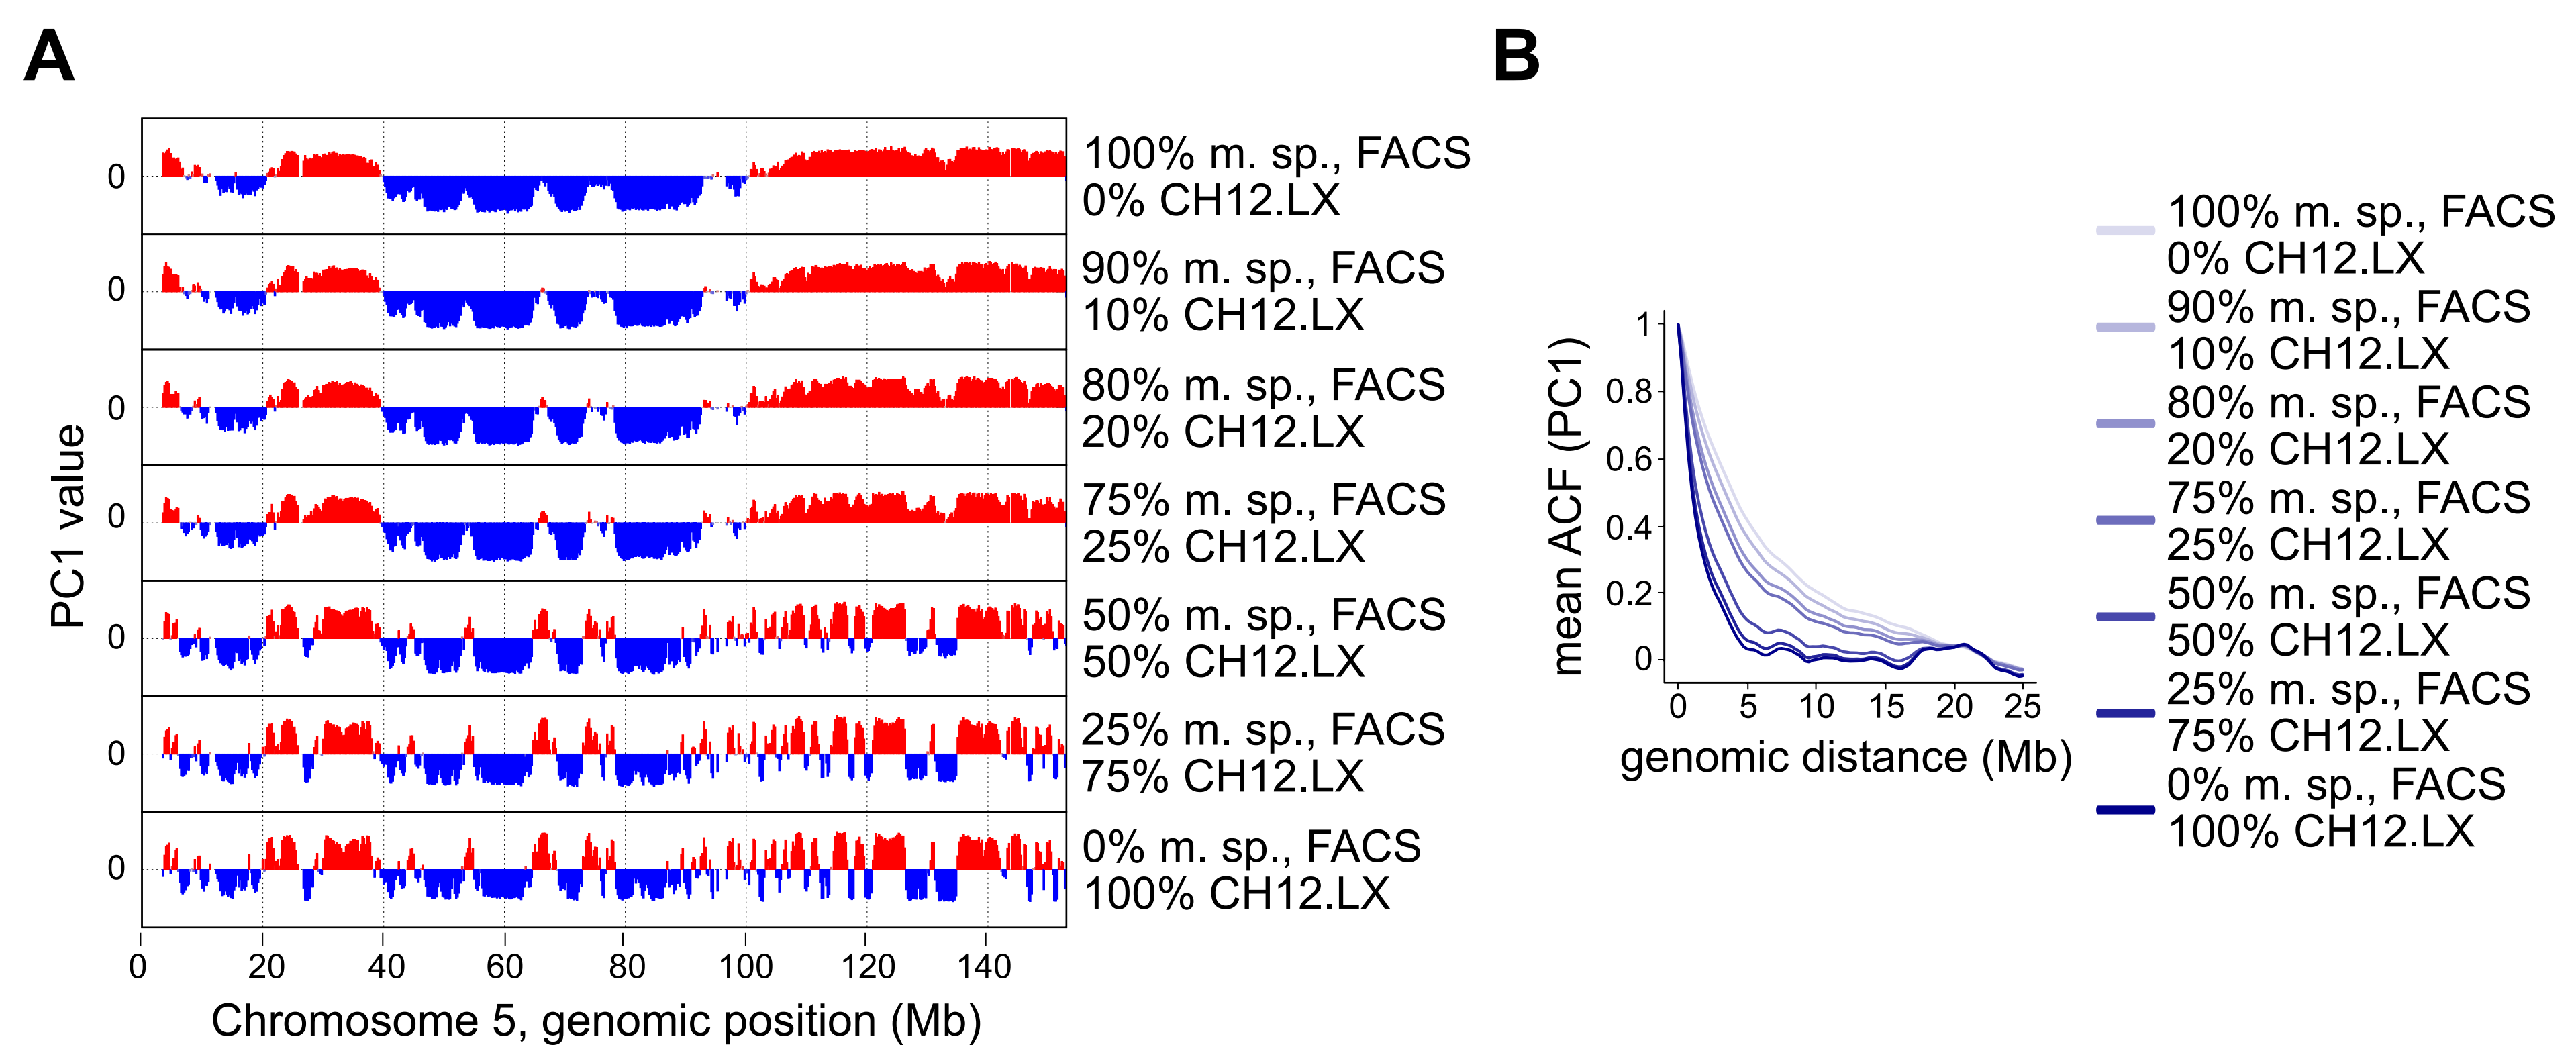

**Supplemental Figure S4.** Somatic contamination of around 50% could explain the somatic-like genome organization observed in mouse sperm.

- (A) Compartment tracks from principal component analysis for *in silico* mixtures of, as indicated, varying percentages of mouse sperm enriched by FACS by Vara et al. 2019 and mouse CH12.LX cells by Rao et al. 2014
- (B) The autocorrelation of the PC1 value as a function of genomic distance, for the same samples as in (A)
