# Supplementary material for: Cohesin and CTCF do not assemble TADs in Xenopus sperm and male pronuclei
Source: PubMed Central journal article supplement — Genome Res. 2023 Dec;33(12):2094–107. doi: 10.1101/gr.277865.123 (PMC10760524; doi:10.1101/gr.277865.123), 2023-12
Supplement: Supplemental_Fig_S5.pdf [file Supplemental_Fig_S5.pdf]

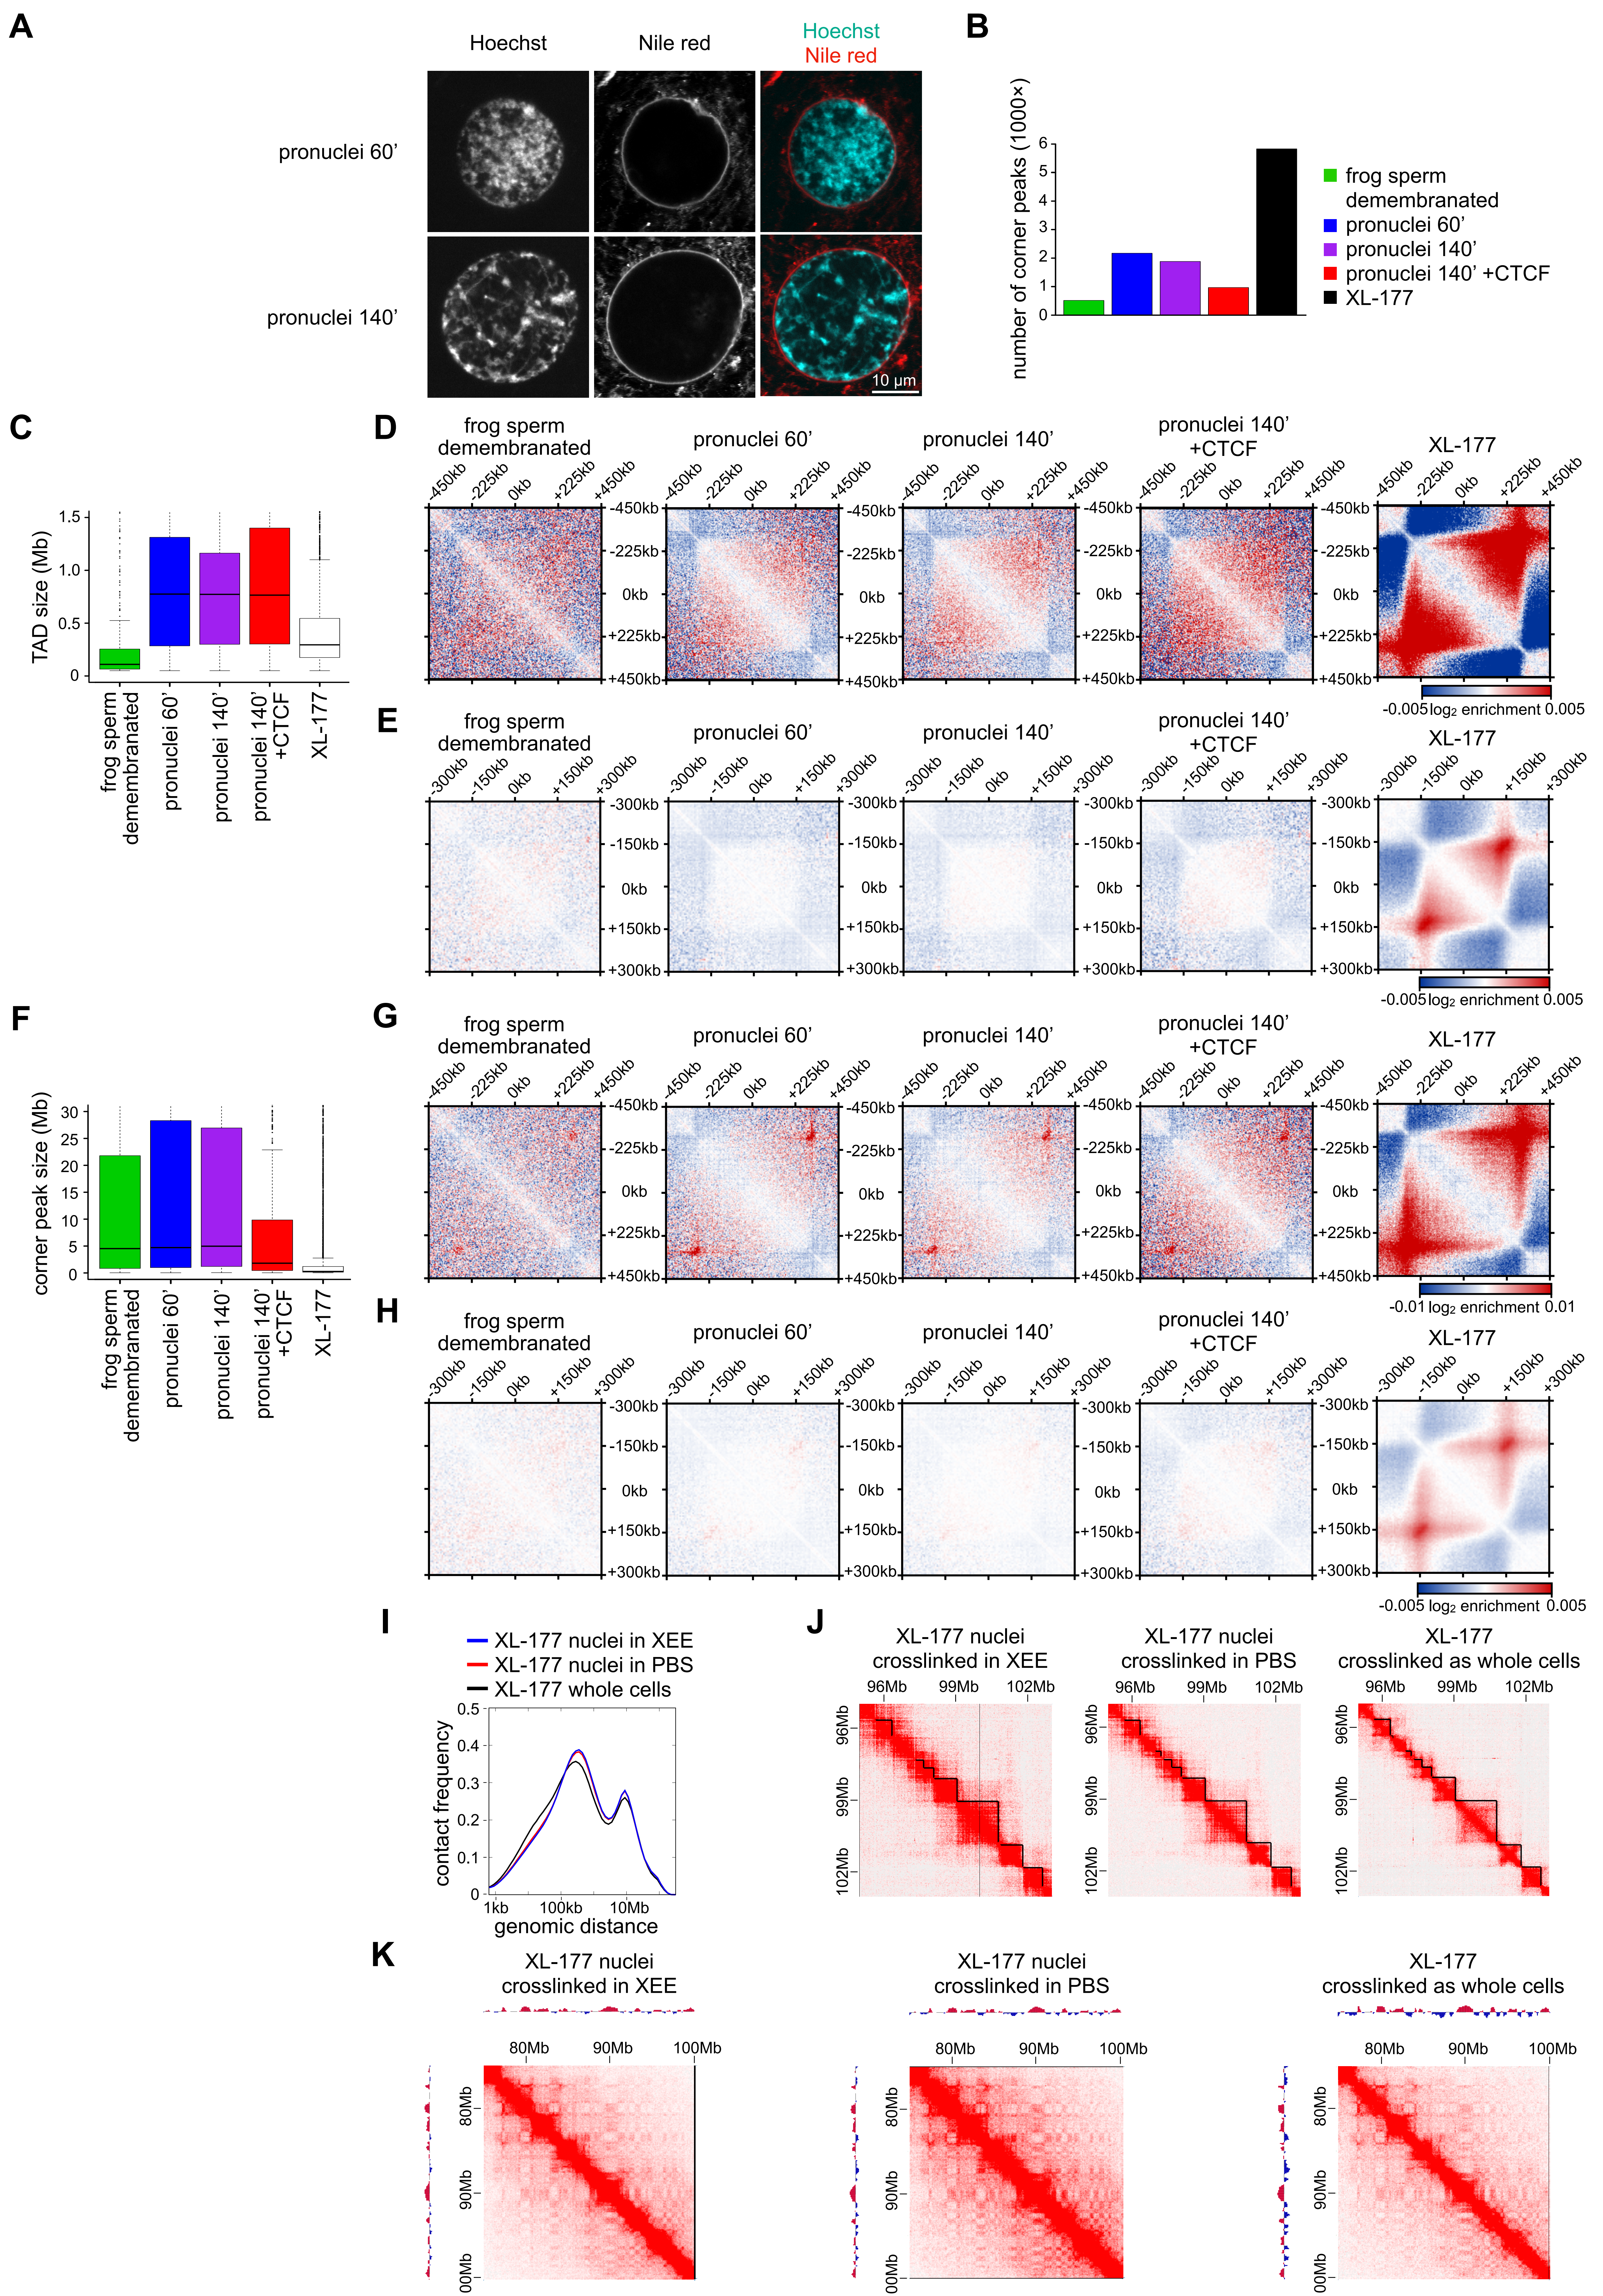

Supplemental Figure S5. Demembranated frog sperm is remodeled upon incubation in egg extract.

**Supplemental Figure S5.** Demembranated frog sperm is remodeled upon incubation in egg extract.

- (A) Confocal microscopy of demembranated frog sperm in *Xenopus* egg extract after 60' (pronuclei 60') or 140' (pronuclei 140') used for Hi-C analysis. Nuclei were stained with Hoechst to visualize DNA and Nile red to visualize the nuclear membrane
- (B) Number of corner peaks called for demembranated frog sperm, pronuclei 60', pronuclei 140', pronuclei 140' with addition of 50 nM CTCF protein and frog XL-177 cells
- (C) TAD size distribution for the same samples as in (B)
- (D) Aggregate contact frequencies (coverage and distance corrected) around the 135 550-650 kb long TADs called in XL-177 cells, for the same samples as in (B)
- (E) Aggregate contact frequencies (coverage and distance corrected) around the 372 250-350 kb long TADs called in XL-177 cells, for the same samples as in (B)
- (F) Corner peak size distribution for the same samples as in (B)
- (G) Aggregate contact frequencies (coverage and distance corrected) around the 109 550-650 kb long corner peaks called in XL-177 cells, for the same samples as in (B)
- (H) Aggregate contact frequencies (coverage and distance corrected) around the 479 250-350 kb long corner peaks called in XL-177 cells, for the same samples as in (B)
- (I) Contact frequency as a function of genomic distance for isolated XL-177 nuclei crosslinked in *Xenopus* egg extract (XEE) or PBS and XL-177 cells crosslinked as whole cells
- (J) Normalized Hi-C matrices for the same samples as in (I) in the region of Chr1S:95-103Mb at 25 kb resolution with TAD calling indicated using black lines
- (K) Normalized Hi-C matrices for the same samples as in (I) in the region of Chr2S:75-100Mb at 100 kb resolution with compartment tracks from principal component analysis
