# Supplementary material for: Cohesin and CTCF do not assemble TADs in Xenopus sperm and male pronuclei
Source: PubMed Central journal article supplement — Genome Res. 2023 Dec;33(12):2094–107. doi: 10.1101/gr.277865.123 (PMC10760524; doi:10.1101/gr.277865.123), 2023-12
Supplement: Supplemental_Fig_S6.pdf [file Supplemental_Fig_S6.pdf]

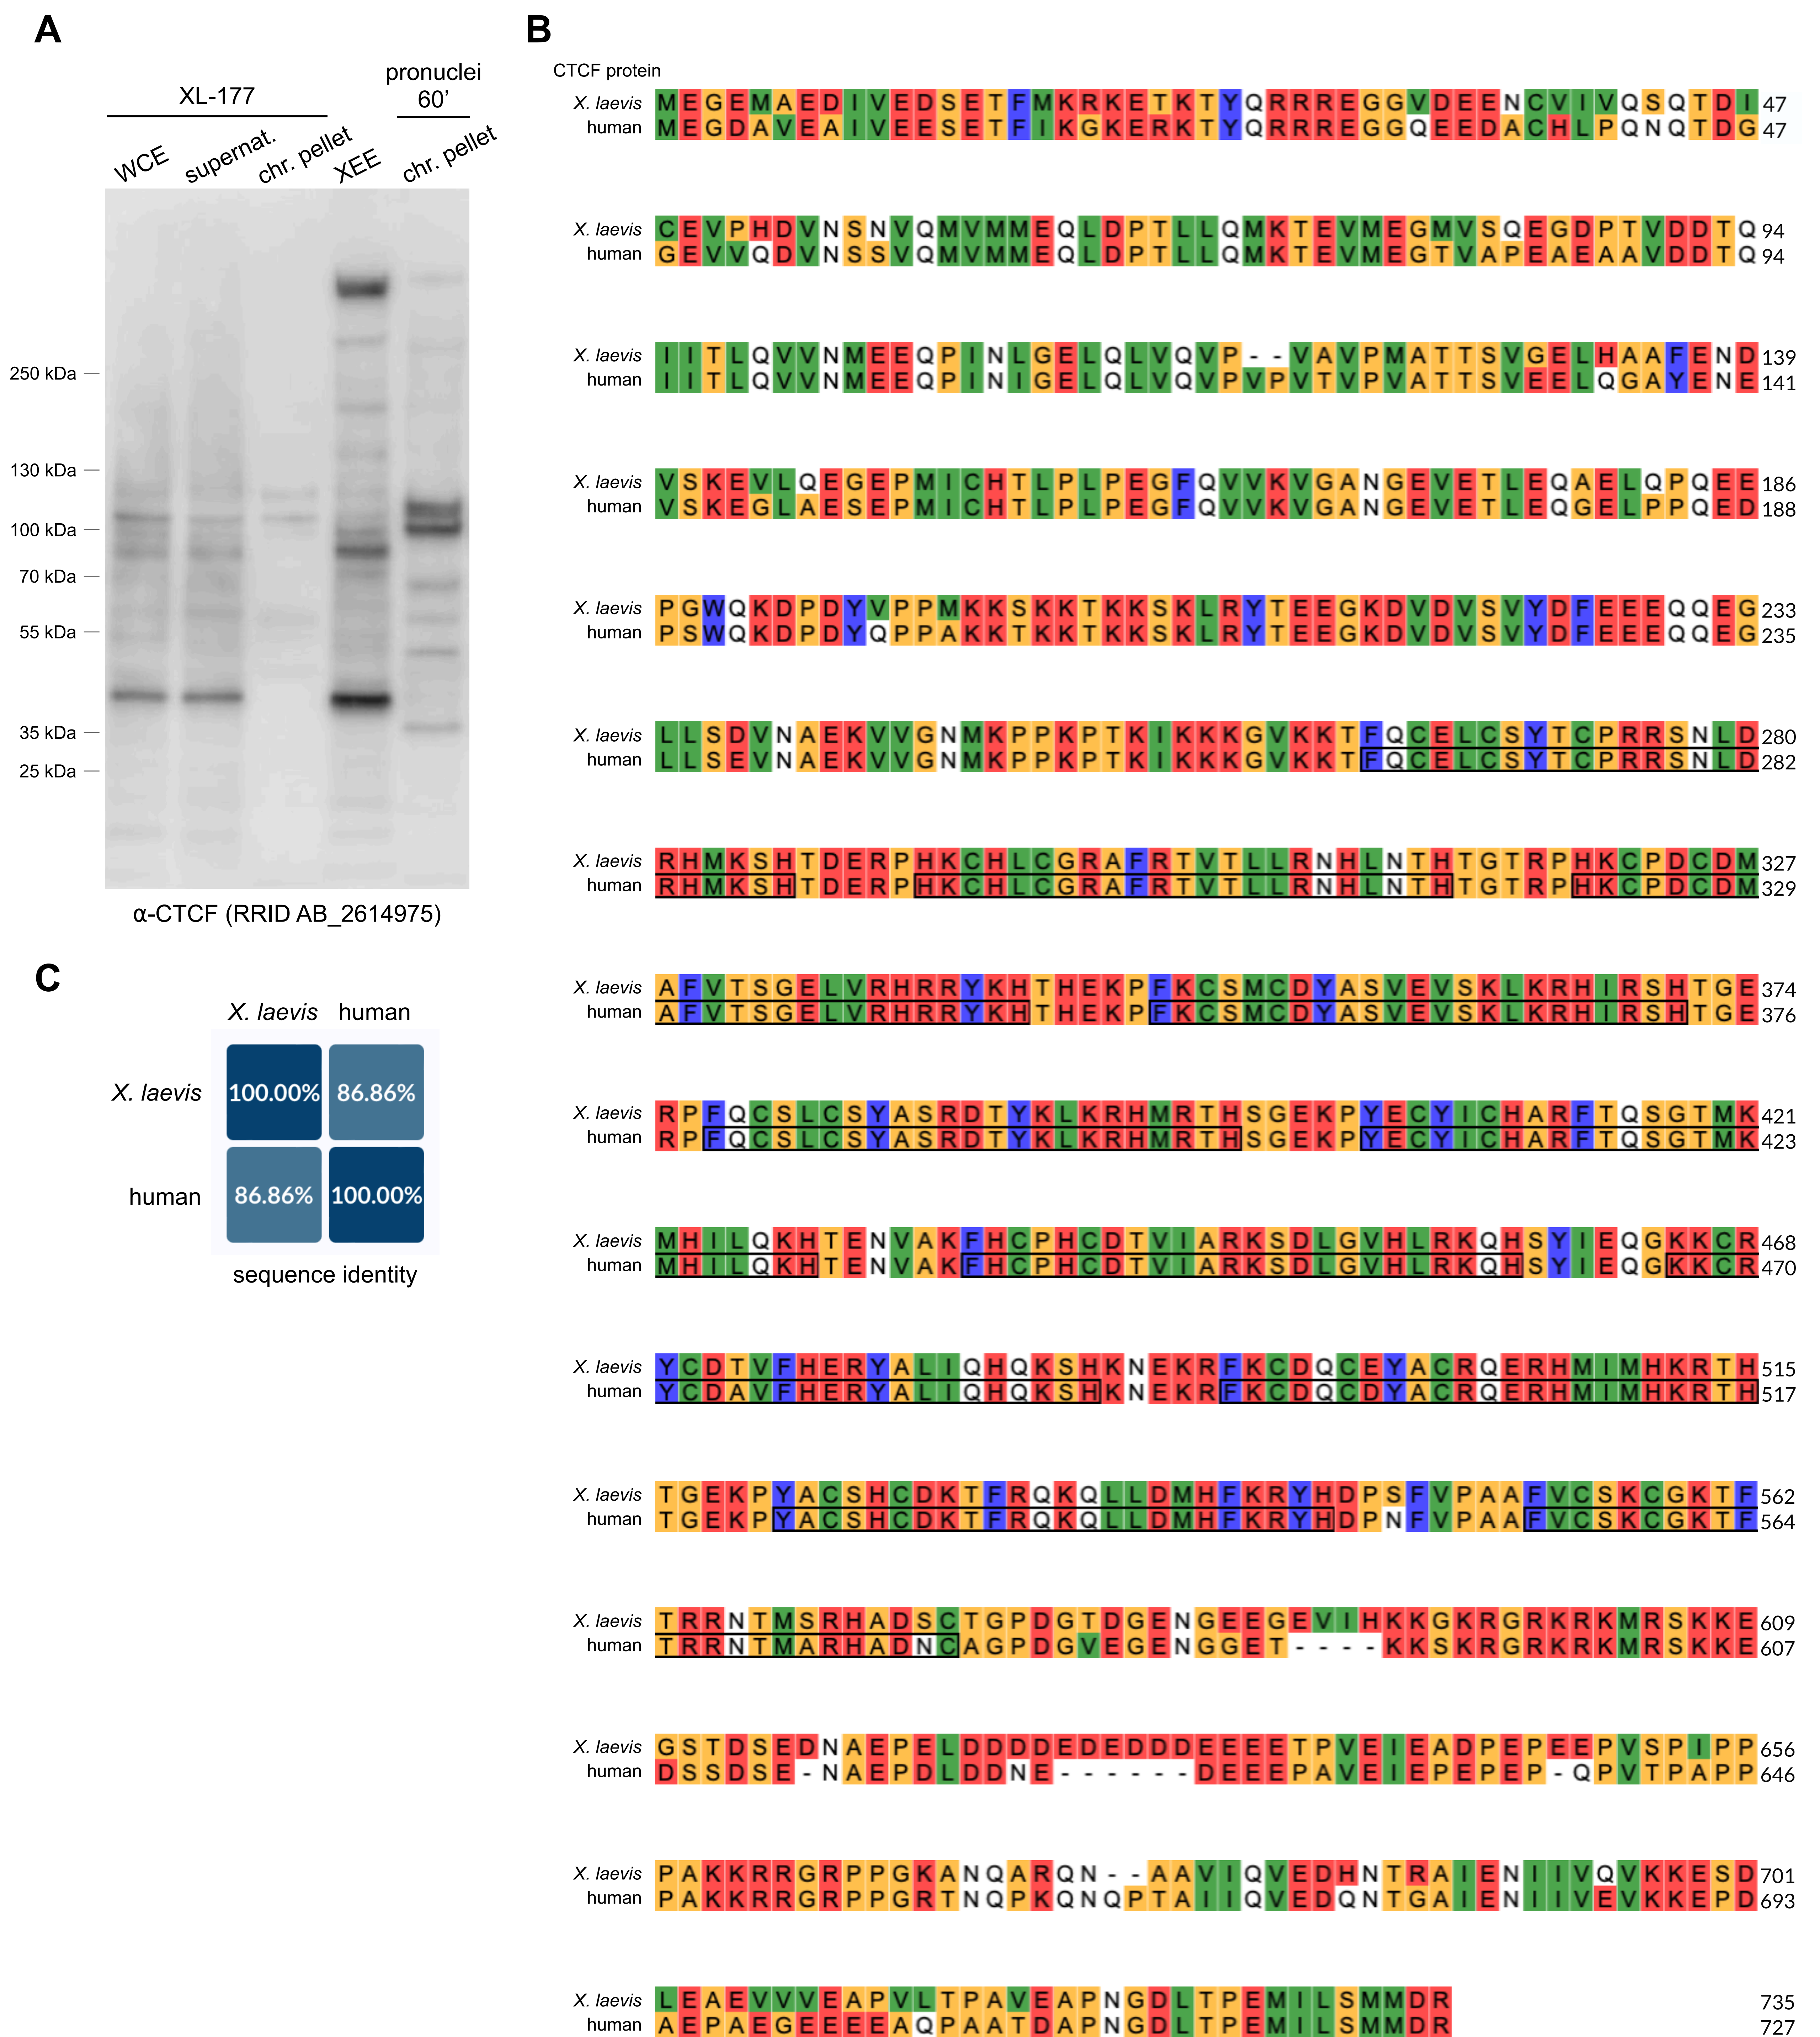

**Supplemental Figure S6.** While antibodies specific for *Xenopus* CTCF could not be identified, *Xenopus* and human CTCF are highly similar. (A) Immunoblotting of chromatin fractionation (whole cell extract, supernatant, chromatin pellet) of XL-177 cells, *Xenopus* egg extract (XEE) and chromatin isolated from demembrated frog sperm in *Xenopus* egg extract after 60' (pronuclei 60') using an antibody not recognizing *Xenopus* CTCF (B) Protein sequence alignment of *Xenopus laevis* (UniProt ID Q9DDQ9) and human (UniProt ID P49711) CTCF. On the human sequence, zinc finger motifs are indicated by black boxes (C) Sequence identity matrix showing sequence similarity for *Xenopus laevis* (UniProt ID Q9DDQ9) and human (UniProt ID P49711) CTCF protein
