# Supplementary material for: Cohesin and CTCF do not assemble TADs inXenopussperm and male pronuclei
Source: HighWire-hosted journal article supplement (doi:10.1101/gr.277865.123), 2023-12-01
Supplement: Supplemental_Methods.docx [file Supplemental_Methods.docx]

# **Supplemental Methods**

# Hi-C library preparation supplemental details

For *Xenopus* demembranated sperm libraries, 10 million nuclei (replicate 1) and 6.66 million nuclei (replicate 2) were used. For *Xenopus* membranated sperm, libraries were generated from 10 million nuclei (replicate 1) and 4 million nuclei (replicate 2).

For human sperm samples, 31-34 million cells were used for density gradient centrifugation samples, and 12.1 million cells for swim-up.

For mouse sperm, libraries were generated from 4.5 million cells.

For *Xenopus* XL-177 libraries, 4.89 million cells (replicate 1) and 5 million cells (replicate 2) were used.

For the first replicate of *Xenopus* pronuclei 60’, 4 mL of egg extract was mixed with 10 million demembranated sperm nuclei; for the first replicate of pronuclei 140’, 3.5 mL extract was mixed with 8.75 million demembranated sperm nuclei. For the second replicates of pronuclei 60’ and 140’, 1 mL of extract with 2.5 million demembranated sperm nuclei was used. For pronuclei 140’ +CTCF, 1.5 mL extract was mixed with 3.75 million demembranated sperm nuclei.

For XL-177 nuclei crosslinked in *Xenopus* egg extract or buffer, libraries were prepared from 2.5 million nuclei.

# Hi-C data processing and normalization

Raw sequencing reads were processed using HiCUP v0.7.1 (Wingett et al. 2015). Sequencing reads were mapped against the hg19, mm9 and *Xenopus laevis* v9.2 assemblies for human, mouse and frog samples, respectively, with Bowtie 2 (Langmead and Salzberg 2012) as the aligner. Instead of more recent assemblies, the hg19, mm9 and *X. laevis* v9.2 reference genomes were used to enable comparisons with datasets and analyses obtained previously in the lab. This choice does not affect the general results and conclusions of our study because we compared samples within each species, where all samples were processed identically. Experimental artifacts, such as circularized fragments or re-ligations, were filtered out, and duplicate reads were removed. The aligned Hi-C data were normalized using matrix balancing. We visualized example Hi-C matrices using Juicebox v1.11.08 (Durand et al. 2016a) and the Knight-Ruiz balancing. We generated contact frequency plots by plotting the frequency of *cis*-chromosomal contacts as a function of genomic distance in the raw data. This was achieved by binning all *cis*-chromosomal log10 contact distances using 100 bins of equal size on a log10 genomic distance plot as described previously (Nagano et al. 2017). By using log genomic distance bins instead of genomic distance bins and displaying them on a logarithmic scale, the power law feature of the contact density profile is flattened, allowing one to see the modulations of the contact frequencies on top of the power law nature.

# TAD and corner peak analysis

TADs were called using the findTADsAndLoops.pl function of HOMER v4.10 (Heinz et al. 2010) with the options -res 5000 -window 25000 -maxDist 2000000 -minTADsize 45000 -minTADscore 2.0. Corner peaks were called using the HiCCUPS function of JuicerTools v1.19.02 (Durand et al. 2016b) with the -k KR --ignore-sparsity options at 5 kb, 10 kb and 25 kb resolutions. We performed aggregate peak analysis in the normalized (coverage and distance corrected) data around the centers of size-selected TADs and corner peaks using HOMER v4.10. We plotted the average Hi-C matrix at 5 kb resolution in a 600 kb window around the centers of 250-350 kb long corner peaks/TADs, and in a 900 kb window around the centers of 550-650 kb long corner peaks/TADs.

# Compartment analysis

The compartment signal was computed as the first principal component of the normalized (coverage and distance corrected) interaction profile correlation matrix at 250 kb bin resolution using the runHiCpca.pl function of HOMER v4.10 (Heinz et al. 2010). For chromosomes where the contact enrichment within chromosome arms was stronger than the compartment signal, we used the second principal component. For the frog datasets, Chromosomes 5L, 5S, 6S and 7S were excluded as the compartment calls were of poor quality due to assembly issues. We compared the lengths of continuous regions of A/B compartments in the different datasets by measuring the average autocorrelation function (ACF) of the compartment signal across all chromosomes. When generating ACF comparisons, we focused on genomic distances of >2 Mb, instead of on the sub-TAD scale, thereby making the ACF analyses largely independent of the presence of TADs or lack thereof. We compared the compartmentalization strength between different datasets by computing a compartmentalization score, measuring the log2 enrichment of *trans*-chromosomal contacts between all A- and B-compartment bins as follows: Compartment score = log2 (2 P(A) P(B) T/OAB) where T = OAA + OAB + OBB and P(A) = (2OAA + OAB)/2T, where OAA, OAB, and OBB are the number of observed *trans*-chromosomal or long-*cis* (>5 Mb) chromosomal contacts between all A–A, A–B, and B–B bin pairs.

# ChIP-seq analysis

Raw ChIP-seq sequencing reads were aligned against the *Xenopus laevis* v9.2 assembly for frog samples and against mm9 for mouse samples using Bowtie 2 (Langmead and Salzberg 2012) with the appropriate index. Peak calling upon these alignments was performed using MACS version 1.4.2 and 2.2.5 (Feng et al. 2012) with an assumed mappable genome size of 2.5e9 and a *p*-value threshold of 1e-10, resp. default parameters for MACS2. The intersection of signals from both methods was considered reliable. For calibrated ChIP-seq, spiked-in fractions of uniquely mappable HeLa Kyoto reads were taken into account to ensure comparable yield efficiencies throughout the ChIP-seq protocol.

Exemplary ChIP-seq tracks were visualized using IGV v2.16 (Robinson et al. 2011). Heatmaps were generated with deepTools2 (Ramírez et al. 2016), using bedGraph output from peak callings converted to bigWig. To analyze the distribution of genomic distances between neighboring peaks, all possible pairs of consecutive peaks were grouped by distance between peaks and boxplots were generated using Spotfire (TIBCO, USA).

*De novo* motif analysis was performed on selected ChIP-seq peaks using the findMotifsGenome.pl function of HOMER v4.10 (Heinz et al. 2010) without a preselected reference peak set and the top five known motifs reported by HOMER were selected.

For analysis of Hi-C contact enrichment between consecutive Smc3 sites, all possible pairs of consecutive peaks were grouped by distance between peaks and served as input for aggregate peak analysis as paired-bed files. JuicerTools v1.19.02 (Durand et al. 2016b) was used for calculating the plots of peak pairs over Hi-C maps with KR-normalization.

# Cell culture

*Xenopus laevis* non-epidermal epithelial XL-177 cells were cultured at 16-20ºC in medium containing 65% Leibovitz’s L-15 (Thermo Fisher Scientific, #11415064), 15% FBS (Gibco, 10270106), 20% H2O, 100 U/mL Penicillin and 100 µg/mL Streptomycin (Sigma-Aldrich, P0781).

HeLa Kyoto cells used for calibrated ChIP-seq experiments were cultured as described previously (Nishiyama et al. 2010).

Mouse embryonic fibroblasts (MEF) were generated and cultured as described previously (Busslinger et al. 2017).

# Isolation of XL-177 nuclei and crosslinking in *Xenopus* egg extract or buffer

To prepare for isolation of nuclei, XL-177 cells were harvested in PBS with 0.04% BSA by scraping, counted using a hemocytometer, and washed twice. The cell concentration was adjusted to 1 million cells per tube, cells were spun down, and the pellet was subjected to nuclei isolation using the 10x Genomics protocol “Nuclei Isolation for Single Cell ATAC Sequencing, Rev D” (10x Genomics, CG000169), section 2 steps C to G. The pellet was subsequently resuspended in 1× sperm dilution buffer as previously described (Lebofsky et al. 2009) and the number of nuclei was counted using a hemocytometer. For subsequent Hi-C library preparation (as described earlier), XL-177 nuclei were crosslinked with formaldehyde either in 1 mL PBS or in 1 mL *Xenopus* egg extract that was previously incubated for 20 min at room temperature with CaCl2, energy regenerator mix and cycloheximide as described earlier.

# Chromatin isolation from XL-177 cells, pronuclei and immunoblotting

Chromatin from *Xenopus* pronuclei was isolated for analysis by immunoblotting as previously described (Gillespie et al. 2012). NIB was prepared without the optional ingredients and for NIB with sucrose, 30% sucrose was added. Cushion washes were performed four times.

Chromatin fractionation of XL-177 cells was performed as previously described (Wutz et al. 2017). Protein concentrations were measured using the Bradford assay and sample concentrations were adjusted. Whole cell extract and chromatin pellet fractions were treated with benzonase nuclease.

SDS-PAGE and immunoblotting was performed according to standard molecular laboratory procedures. Samples were separated on Novex 4-12% Tris-Glycine gels (Invitrogen) and transferred to PVDF membranes (Millipore) using semi-dry electroblotting. The following primary antibodies were used: anti-CTCF (A992, Peters Laboratory, Busslinger et al. 2017, 1.2 µg/mL), anti-CTCF (Active Motif, 61311, RRID AB_2614975, 1:1,000), anti-Smc3 (Bethyl, A300-060A, 1:1,000), anti-Stag1 (A1047, Peters Laboratory, 2 µg/mL), anti-acetylated Smc3 (A683, Katsuhiko Shirahige, Nishiyama et al. 2010, 1 µg/mL), anti-PCNA (PC10) (Santa Cruz, sc-56, 1:1,000), anti-histone H3 (Cell Signaling, #9715, 1:1,000), anti-histone H3 (Santa Cruz, sc-8654, 1:1,000), anti-alpha-tubulin (Sigma-Aldrich, T5168, 1:10,000). The following HRP-conjugated secondary antibodies were used: anti-mouse Ig (Amersham GE Healthcare, 1:5,000), anti-rabbit Ig (Bio-Rad, 1:3,000), anti-goat Ig (Dako, P0449, 1:5,000). Detection was performed using Pierce ECL Western Blotting Substrate (Thermo Fisher Scientific, #32106) and a Bio-Rad ChemiDoc Imaging System.

Quantification of immunoblots was performed using Fiji (Schindelin et al. 2012).

# Protein sequence alignments

Protein sequence alignments were performed using Clustal Omega (Sievers et al. 2011).

**Supplemental References**

Busslinger GA, Stocsits RR, van der Lelij P, Axelsson E, Tedeschi A, Galjart N, Peters J-M. 2017. Cohesin is positioned in mammalian genomes by transcription, CTCF and Wapl. *Nature* 1–24.

Durand NC, Robinson JT, Shamim MS, Machol I, Mesirov JP, Lander ES, Aiden EL. 2016a. Juicebox Provides a Visualization System for Hi-C Contact Maps with Unlimited Zoom. *Cell Syst* **3**: 99–101.

Durand NC, Shamim MS, Machol I, Rao SSP, Huntley MH, Lander ES, Aiden EL. 2016b. Juicer Provides a One-Click System for Analyzing Loop-Resolution Hi-C Experiments. *Cell Syst* **3**: 95–98.

Feng J, Liu T, Qin B, Zhang Y, Liu XS. 2012. Identifying ChIP-seq enrichment using MACS. *Nat Protoc* **7**: 1728–1740.

Gillespie PJ, Gambus A, Blow JJ. 2012. Preparation and use of Xenopus egg extracts to study DNA replication and chromatin associated proteins. *Methods* **57**: 203–213.

Heinz S, Benner C, Spann N, Bertolino E, Lin YC, Laslo P, Cheng JX, Murre C, Singh H, Glass CK. 2010. Simple Combinations of Lineage-Determining Transcription Factors Prime cis-Regulatory Elements Required for Macrophage and B Cell Identities. *Mol Cell* **38**: 576–589.

Langmead B, Salzberg SL. 2012. Fast gapped-read alignment with Bowtie 2. *Nat Methods* **9**: 357–359.

Lebofsky R, Takahashi T, Walter JC. 2009. DNA replication in nucleus-free Xenopus egg extracts. *Methods Mol Biol Clifton NJ* **521**: 229–252.

Nagano T, Lubling Y, Várnai C, Dudley C, Leung W, Baran Y, Cohen NM, Wingett S, Fraser P, Tanay A. 2017. Cell-cycle dynamics of chromosomal organization at single-cell resolution. *Nature* **547**: 61–67.

Nishiyama T, Ladurner R, Schmitz J, Kreidl E, Schleiffer A, Bhaskara V, Bando M, Shirahige K, Hyman AA, Mechtler K, et al. 2010. Sororin Mediates Sister Chromatid Cohesion by Antagonizing Wapl. *Cell* **143**: 737–749.

Ramírez F, Ryan DP, Grüning B, Bhardwaj V, Kilpert F, Richter AS, Heyne S, Dündar F, Manke T. 2016. deepTools2: a next generation web server for deep-sequencing data analysis. *Nucleic Acids Res* **44**: W160-165.

Robinson JT, Thorvaldsdóttir H, Winckler W, Guttman M, Lander ES, Getz G, Mesirov JP. 2011. Integrative genomics viewer. *Nat Biotechnol* **29**: 24–26.

Schindelin J, Arganda-Carreras I, Frise E, Kaynig V, Longair M, Pietzsch T, Preibisch S, Rueden C, Saalfeld S, Schmid B, et al. 2012. Fiji: an open-source platform for biological-image analysis. *Nat Methods* **9**: 676–682.

Sievers F, Wilm A, Dineen D, Gibson TJ, Karplus K, Li W, Lopez R, McWilliam H, Remmert M, Söding J, et al. 2011. Fast, scalable generation of high-quality protein multiple sequence alignments using Clustal Omega. *Mol Syst Biol* **7**: 539.

Wingett SW, Ewels P, Furlan-Magaril M, Nagano T, Schoenfelder S, Fraser P, Andrews S. 2015. HiCUP: pipeline for mapping and processing Hi-C data. *F1000Research* **4**: 1310.

Wutz G, Várnai C, Nagasaka K, Cisneros DA, Stocsits RR, Tang W, Schoenfelder S, Jessberger G, Muhar M, Hossain MJ, et al. 2017. Topologically associating domains and chromatin loops depend on cohesin and are regulated by CTCF, WAPL, and PDS5 proteins. *EMBO J* e201798004-27.
