# Supplementary material for: Cohesin and CTCF do not assemble TADs inXenopussperm and male pronuclei
Source: HighWire-hosted journal article supplement (doi:10.1101/gr.277865.123), 2023-12-01
Supplement: Supplemental_Table_S1.xlsx [file Supplemental_Table_S1.xlsx]

## Sheet: Supplemental Table S1
Supplemental Table S1.
Brief overview of previously published data on paternal genome organization in different species.
species	genome organization in sperm	TADs during embryonic development	references
Mus musculus	somatic-like presence of corner peaks, TADs and compartments		Battulin et al. 2015; Ke et al. 2017; Du et al. 2017; Jung et al. 2017, 2019; Luo et al. 2020
	one contrasting study: no TADs; compartments of coarse quality		Vara et al. 2019
Macaca mulatta	somatic-like presence of corner peaks, TADs and compartments		Wang et al. 2019
Homo sapiens	no TADs; compartments of coarse quality		Chen et al. 2019
Xenopus tropicalis	no TADs; no compartments		Niu et al. 2021, Shi et al. 2023
Danio rerio	no TADs, but hinge-like domains; compartments exist		Wike et al. 2021
Mus musculus, Macaca mulatta, Homo sapiens, Xenopus tropicalis, Drosophila melanogaster		TAD strenght reaches somatic levels only at zygotic genome activation (ZGA)	Du et al. 2017; Ke et al. 2017; Chen et al. 2019; Niu et al. 2021; Hug et al. 2017
Danio rerio		TADs are present in zygotes, disassembled during ZGA and later reassembled	Kaaij et al. 2018
Supplemental References
Battulin N, Fishman VS, Mazur AM, Pomaznoy M, Khabarova AA, Afonnikov DA, Prokhortchouk EB, Serov OL. 2015. Comparison of the three-dimensional organization of sperm and fibroblast genomes using the Hi-C approach. Genome Biol 16: 77.
Chen X, Ke Y, Wu K, Zhao H, Sun Y, Gao L, Liu Z, Zhang J, Tao W, Hou Z, et al. 2019. Key role for CTCF in establishing chromatin structure in human embryos. Nature 1–31.
Du Z, Zheng H, Huang B, Ma R, Wu J, Zhang X, He J, Xiang Y, Wang Q, Li Y, et al. 2017. Allelic reprogramming of 3D chromatin architecture during early mammalian development. Nature 547: 232–235.
Hug CB, Grimaldi AG, Kruse K, Vaquerizas JM. 2017. Chromatin Architecture Emerges during Zygotic Genome Activation Independent of Transcription. Cell 169: 216-228.e19.
Jung YH, Kremsky I, Gold HB, Rowley MJ, Punyawai K, Buonanotte A, Lyu X, Bixler BJ, Chan AWS, Corces VG. 2019. Maintenance of CTCF- and Transcription Factor- Mediated Interactions from the Gametes to the Early Mouse Embryo. Mol Cell 1–24.
Jung YH, Sauria MEG, Lyu X, Cheema MS, Ausio J, Taylor J, Corces VG. 2017. Chromatin States in Mouse Sperm Correlate with Embryonic and Adult Regulatory Landscapes. Cell Rep 18: 1366–1382.
Kaaij LJT, van der Weide RH, Ketting RF, de Wit E. 2018. Systemic Loss and Gain of Chromatin Architecture throughout Zebrafish Development. Cell Rep 24: 1-10.e4.
Ke Y, Xu Y, Chen X, Feng S, Liu Z, Sun Y, Yao X, Li F, Zhu W, Gao L, et al. 2017. 3D Chromatin Structures of Mature Gametes and Structural Reprogramming during Mammalian Embryogenesis. Cell 170: 367-381.e20.
Luo Z, Wang X, Jiang H, Wang R, Chen J, Chen Y, Xu Q, Cao J, Gong X, Wu J, et al. 2020. Reorganized 3D Genome Structures Support Transcriptional Regulation in Mouse Spermatogenesis. ISCIENCE 23: 101034.
Niu L, Shen W, Shi Z, Tan Y, He N, Wan J, Sun J, Zhang Y, Huang Y, Wang W, et al. 2021. Three-dimensional folding dynamics of the Xenopus tropicalis genome. Nat Genet 53: 1075–1087.
Shi Z, Xu J, Niu L, Shen W, Yan S, Tan Y, Quan X, Cheung E, Huang K, Chen Y, et al. 2023. Evolutionarily distinct and sperm-specific supersized chromatin loops are marked by Helitron transposons in Xenopus tropicalis. Cell Rep 42: 112151.
Vara C, Paytuví-Gallart A, Cuartero Y, Le Dily F, Garcia F, Salvà-Castro J, Gómez-H L, Julià E, Moutinho C, Cigliano RA, et al. 2019. Three-Dimensional Genomic Structure and Cohesin Occupancy Correlate with Transcriptional Activity during Spermatogenesis. Cell Rep 28: 352-367.e9.
Wang Y, Wang H, Zhang Y, Du Z, Si W, Fan S, Qin D, Wang M, Duan Y, Li L, et al. 2019. Reprogramming of Meiotic Chromatin Architecture during Spermatogenesis. Mol Cell 73: 547-561.e6.
Wike CL, Guo Y, Tan M, Nakamura R, Shaw DK, Díaz N, Whittaker-Tademy AF, Durand NC, Aiden EL, Vaquerizas JM, et al. 2021. Chromatin architecture transitions from zebrafish sperm through early embryogenesis. Genome Res 31: 981–994.
