# Supplementary material for: Cohesin and CTCF do not assemble TADs inXenopussperm and male pronuclei
Source: HighWire-hosted journal article supplement (doi:10.1101/gr.277865.123), 2023-12-01
Supplement: Supplemental_Table_S2.xlsx [file Supplemental_Table_S2.xlsx]

## Sheet: Supplemental Table S2
Supplemental Table S2.
Summary statistics for Hi-C datasets analyzed in this study.
condition	source	biological replicate	HiCUP version	restriction enzyme	sample name	total read pairsa	unique read pairsb	trans read pairsc	% trans read pairsc	unique read pairs of merged replicates	number of trans read pairsc	% trans read pairsc	cis comp.scored	trans comp.scoree	TAD genome coveragef (%)	number of TADsg	median TAD length (bp)	number of corner peaksh	median corner peak length (bp)
Human sperm DGC biol. rep. 2	this study	2	0.7.1	MboI	80696_human-sperm_2	195234786	43213867	18224065	0.421718	81058862	31771583	0.391957	0.150917	0.149245	1.69106	350	65000	41	650000
Human sperm DGC biol. rep. 4	this study	4	0.7.1	MboI	87101_human-sperm_4	263131507	37845890	13548057	0.35798
Human sperm swim-up NovaSeq	this study	1	0.7.1	MboI	114161_human-sperm_swimup_NovaSeq	238840303	16188629	7475303	0.461763	34376039	15881516	0.461994	0.137397	0.133777	17.5082	7349	60000	59	175000
Human sperm swim-up HiSeq	this study	1	0.7.1	MboI	114161_human-sperm_swimup_HiSeq	230846645	18187410	8406213	0.4622
Human IMR-90 Rao-2014 1-3	GSE63525	1	0.7.1	MboI	human-IMR90_Rao-2014	396971380	161387442	25771157	0.159685	161387442	25771157	0.159685	0.465249	0.291332	38.8554	2178	385000	6120	250000
Human IMR-90 Rao-2014 1-3 downsampled	GSE63525	1	0.7.1	MboI	human-IMR90_Rao-2014_downsampled	-	81500083	-	-	81500083	-	-	-	-	-	2217	390000	3628	225000
Human HeLa G1 Wutz-2017	GSE102884	1+2	0.5.8	HindIII	human-HeLa-G1-ctrl_Wutz-2017	439832590	-	-	-	154737947	-	-	0.37	0.49	58.8	3115	445000	10310	-
Human HeLa G1 WAB-depletion Wutz-2017	GSE102884	1+2	0.5.8	HindIII	human-HeLa-G1-WAB_Wutz-2017	457871059	-	-	-	166883744	-	-	0.07	0.08	59.1	2662	570000	5259	-
Human HeLa PM Wutz-2017	GSE102884	1+2	0.5.8	HindIII	human-HeLa-PM_Wutz-2017	567505689	-	-	-	174840835	-	-	0	0.02	45.6	1426	788000	57	-
Mouse sperm swim-up	this study	1	0.7.1	MboI	87100_mouse-sperm	300330067	50279650	18904215	0.375981	50279650	18904215	0.375981	0.287446	0.251754	14.6588	1321	95000	25	125000
Mouse CH12.LX Rao-2014 1	GSE63525	1	0.7.1	MboI	mouse-CH12LX_Rao-2014_1	322254461	96154274	31668356	0.329349	96154274	31668356	0.329349	0.449364	0.137429	21.6374	1337	305000	3595	175000
Mouse sperm Jung-2019 1	GSE116857	1	0.7.1	DpnII	mouse-sperm_Jung-2019_1+3+4	958841959	183818292	66162793	0.359936	603094829	244774873	0.405865	0.300359	0.235972	11.6565	470	467500	1653	175000
Mouse sperm Jung-2019 2		2	0.7.1	DpnII	mouse-sperm_Jung-2019_2	1225497862	419276537	178612080	0.426001
Mouse sperm Vara-2019 1	GSE132054	1	0.7.1	MboI	mouse-sperm_Vara-2019_1	248883003	145194132	57526423	0.396203	266517489	109451783	0.410674	0.184103	0.221066	0.669952	30	495000	39	1085000
Mouse sperm Vara-2019 2		2	0.7.1	MboI	mouse-sperm_Vara-2019_2	219947094	121323357	51925360	0.427991
Mouse WT MEF Banigan-2023	GSE196621	-	-	HindIII	MEF_wt_Banigan-2023	-	-	-	-	-	-	-	-	-	-	-	-	-	-
Mouse Smc3 KO MEF Banigan-2023		-	-	HindIII	MEF_Smc3Ko_Banigan-2023	-	-	-	-	-	-	-	-	-	-	-	-	-	-
Frog sperm biol. rep. 1	this study	1	0.7.1	MboI	61552_Xenopus-sperm_membranated	313648237	55886045	26763179	0.478888	104285857	53802670	0.515915	0.21996	0.0131333	3.49328	420	75000	711	4175000
Frog sperm biol. rep. 2	this study	2	0.7.1	MboI	80697_Xenopus-sperm_membranated_2	182102757	48399812	27039491	0.558669
Frog sperm demembranated biol. rep. 1	this study	1	0.7.1	MboI	58446_Xenopus-sperm_demembranated	251414009	37462370	13780368	0.367846	97169431	50074987	0.515337	0.16116	0.00619516	3.21655	279	110000	517	4525000
Frog sperm demembranated biol. rep. 2	this study	2	0.7.1	MboI	83360_Xenopus-sperm_demembranated_2	243169947	59707061	36294619	0.607878
Frog pronuclei 60min biol. rep. 1	this study	1	0.7.1	MboI	61743_XEE-nuclei_60min	206810911	66470282	25522040	0.383962	162567725	85727107	0.527332	0.174327	0.0255255	13.3643	399	775000	2172	4711250
Frog pronuclei 60min biol. rep. 2	this study	2	0.7.1	MboI	82640_XEE-nuclei_60min_2	258379544	96097443	60205067	0.6265
Frog pronuclei 140min biol. rep. 1	this study	1	0.7.1	MboI	65093_XEE-nuclei_140min	265514286	86534373	39996571	0.462204	175303420	78924291	0.450215	0.246444	0.0868627	10.3602	320	772500	1883	4970000
Frog pronuclei 140min biol. rep. 2	this study	2	0.7.1	MboI	82641_XEE-nuclei_140min_2	234338997	88769047	38927720	0.438528
Frog pronuclei 140min +CTCF NovaSeq	this study	1	0.7.1	MboI	114162_XEE-nuclei_140min_plusCTCF_NovaSeq	241933623	44693421	22958868	0.513697	96035940	48248766	0.502403	0.292432	0.0666802	15.0719	440	765000	969	1810000
Frog pronuclei 140min +CTCF HiSeq	this study	1	0.7.1	MboI	114162_XEE-nuclei_140min_plusCTCF_HiSeq	219246934	51342519	26360638	0.513427
Frog XL-177 biol. rep. 1	this study	1	0.7.1	MboI	56336_XL177	167764103	59889384	14993499	0.250353	141919067	37316030	0.262939	0.253243	0.17527	43.0952	2500	295000	5832	275000
Frog XL-177 biol. rep. 2	this study	2	0.7.1	MboI	81804_XL177_2	209987420	82029683	22322531	0.272127
Frog XL-177 downsampled	this study	1+2	0.7.1	MboI	56336_81804_XL177_downsampled	-	100758665	-	-	100758665	-	-	-	-	-	2563	290000	4170	250000
Frog XL-177 nuclei XEE-crosslinked	this study	1	0.7.1	MboI	127861_XL177_XEE-fixed	665031218	224234923	63606745	0.283661	224234923	63606745	0.283661	0.211641	0.137665	34.4749	1753	340000	5698	325000
Frog XL-177 nuclei PBS-crosslinked	this study	1	0.7.1	MboI	127871_XL177_buffer-fixed	644116429	225872421	64004091	0.283364	225872421	64004091	0.283364	0.220476	0.106794	37.0756	1918	330000	6109	325000
a: raw number of read pairs from paired-end sequencing
b: unique valid mapped read pairs from HiCUP
c: unique valid read pairs that are inter-chromosomal
d: log2 contact enrichment of A-A and B-B contacts for long-range (>5 Mb) intra-chromosomal contacts
e: log2 contact enrichment of A-A and B-B contacts for inter-chromosomal contacts
f: % of genome covered by TADs called by HOMER
g: number of TADs called by HOMER
h: number of corner peaks called by the HiCCUPS algorithm of JuicerTools
