# Supplementary material for: Cohesin and CTCF do not assemble TADs inXenopussperm and male pronuclei
Source: HighWire-hosted journal article supplement (doi:10.1101/gr.277865.123), 2023-12-01
Supplement: Supplemental_Table_S3.xlsx [file Supplemental_Table_S3.xlsx]

## Sheet: Supplemental Table S3
Supplemental Table S3.
Summary statistics for in silico mixed mouse Hi-C datasets analyzed in this study.
sample name	sperm content (%)a	CH12.LX content (%)b	unique read pairs of merged replicates	number of trans read pairs	% trans read pairs	cis comp.scorec	trans comp.scored	TAD genome coveragee (%)	number of TADse	median TAD lengthe (bp)	number of corner peaksf	median corner peak lengthf (bp)
mix-100 (FACS-isolated sperm)	1	0	100000000	41071235	0.410712	0.18921	0.220516	0.689087	39	325000	13	437500
mix-99.9	0.999	0.001	100000000	41050771	0.410508	0.17795	0.221687	0.659152	38	307500	12	756250
mix-99.8	0.998	0.002	100000000	41051674	0.410517	0.175629	0.22107	0.598523	36	312500	15	370000
mix-99.5	0.995	0.005	100000000	40984808	0.409848	0.18875	0.220265	0.720539	39	355000	12	403750
mix-99	0.99	0.01	100000000	41029917	0.410299	0.180713	0.219741	0.607048	36	320000	11	1087500
mix-98	0.98	0.02	100000000	40902379	0.409024	0.19399	0.219306	0.672414	36	370000	14	370833
mix-95	0.95	0.05	100000000	40653330	0.406533	0.194889	0.217007	0.658204	36	377500	18	502500
mix-90	0.9	0.1	100000000	40252082	0.402521	0.200275	0.211605	0.846912	43	315000	20	247500
mix-80	0.8	0.2	99999999	39436624	0.394366	0.19924	0.195502	0.809966	49	330000	109	175000
mix-75	0.75	0.25	100000000	39035172	0.390352	0.191854	0.186647	0.916636	56	320000	230	156250
mix-50	0.5	0.5	100000000	36998449	0.369984	0.221315	0.153512	3.24365	247	260000	1246	162500
mix-25	0.25	0.75	100000000	34965973	0.34966	0.300782	0.145536	10.9822	757	275000	2458	175000
mix-0 (CH12.LX)	0	1	96154274	31668356	0.329349	0.449364	0.137429	21.6374	1337	305000	3595	175000
swim up-isolated mouse sperm (this study)	-	-	50279650	18904215	0.375981	0.287446	0.251754	14.6588	1321	95000	25	125000
a: mouse sperm enriched by FACS by Vara et al. 2019
b: mouse CH12.LX cells by Rao et al. 2014
c: log2 contact enrichment of A-A and B-B contacts for long-range (>5Mb) intra-chromosomal contacts
d: log2 contact enrichment of A-A and B-B contacts for inter-chromosomal contacts
e: TADs called by HOMER v4.10
f: corner peaks called by the HiCCUPS algorithm of JuicerTools v1.19.02
