# Supplementary material for: Cohesin and CTCF do not assemble TADs inXenopussperm and male pronuclei
Source: HighWire-hosted journal article supplement (doi:10.1101/gr.277865.123), 2023-12-01
Supplement: Supplemental_Table_S4.xlsx [file Supplemental_Table_S4.xlsx]

## Sheet: Supplemental Table S4
Supplemental Table S4.
Validation of crosslinking procedures: XL-177 nuclei crosslinked in Xenopus egg extract (XEE) or PBS, or as whole cells.
Pearson correlation of TAD scoresa	XL-177 nuclei in PBS	XL-177 nuclei in XEE
XL-177 whole cells	0.9256	0.9274
XL-177 nuclei in XEE	0.9735
Pearson correlation of loop scoresb	XL-177 nuclei in PBS	XL-177 nuclei in XEE
XL-177 whole cells	0.9503	0.9515
XL-177 nuclei in XEE	0.969
Pearson correlation of PC1 scoresc	XL-177 nuclei in PBS	XL-177 nuclei in XEE
XL-177 whole cells	0.8954	0.8557
XL-177 nuclei in XEE	0.9838
a: TAD scores computed using HOMER v4.10, using the union of TADs
b: loop scores computed using HOMER v4.10, using the union of loops
c: compartment PC scores computed using HOMER v4.10, using chromosomes with good compartment calls
