# Supplementary material for: Cohesin and CTCF do not assemble TADs inXenopussperm and male pronuclei
Source: HighWire-hosted journal article supplement (doi:10.1101/gr.277865.123), 2023-12-01
Supplement: Supplemental_Table_S5.xlsx [file Supplemental_Table_S5.xlsx]

## Sheet: Supplemental Table S5
Supplemental Table S5.
Summary statistics for ChIP-seq datasets analyzed in this study.
condition	antibody	source	biological replicate	total peaks	total peaks in merged dataset
Pronuclei 140min	Smc3	this study	1	9841	-
Pronuclei 140min +50nM CTCF	Smc3	this study	1	43648	71,952*
Pronuclei 140min +123nM CTCF	Smc3	this study	1	48065
Pronuclei 140min +50nM CTCF	CTCF	this study	1	106961	126,263*
Pronuclei 140min +123nM CTCF	CTCF	this study	1	99758
XL-177	Smc3	this study	1	56653	-
Mouse WT MEF	Smc3	this study	1	36070	64280
Mouse WT MEF	Smc3	this study	2	19321
Mouse WT MEF	Smc3	this study	3	55694
Mouse WT MEF	CTCF	GSM1979778	1	31648	51694
Mouse WT MEF	CTCF	GSM1979779	2	52193
* To generate the merged dataset, the pronuclei 140' +50nM CTCF and +123nM CTCF datasets were merged on the alignment level. With the increased sequencing depth, a higher number of peaks could be called.
