# Supplementary material for: Cohesin and CTCF do not assemble TADs inXenopussperm and male pronuclei
Source: HighWire-hosted journal article supplement (doi:10.1101/gr.277865.123), 2023-12-01
Supplement: Supplemental_Table_S6.xlsx [file Supplemental_Table_S6.xlsx]

## Sheet: Supplemental Table S6
Supplemental Table S6.
De novo motif analysis for ChIP-seq datasets from demembranated frog sperm in Xenopus egg extract after 140’ (pronuclei 140') and pronuclei 140’ with addition of CTCF protein.
motifs enriched in pronuclei 140' +CTCF, CTCF-only peaks (62,292 sites)
motif	motif name	% sites	% background	p-value
	CTCF	30.3	1.3	1e-19274
	CTCFL	23.48	1.16	1e-13810
	Zic3	11.21	3.22	1e-1717
	Unknown-ESC-element	12.43	3.94	1e-1675
	Bcl11a	14.91	5.57	1e-1578
motifs enriched in pronuclei 140' +CTCF, CTCF and Smc3 shared peaks (63,971 sites)
motif	motif name	% sites	% background	p-value
	CTCF	53.79	1.25	1e-46422
	CTCFL	46.58	1.12	1e-39145
	Zic3	15.97	3.02	1e-4044
	Unknown-ESC-element	17.81	3.99	1e-3855
	Bcl11a	18.89	5.33	1e-3159
motifs enriched in pronuclei 140' +CTCF, Smc3-only peaks (6,354 sites)
motif	motif name	% sites	% background	p-value
	CTCF	5.45	1.14	1e-120
	CTCFL	5.1	1.17	1e-102
	REST-NRSF	0.68	0.05	1e-34
	NFkB-p50,p52	2.14	0.7	1e-28
	Zfp809	1.94	0.64	1e-25
motifs enriched in pronuclei 140', Smc3 peaks (9,841 sites)
motif	motif name	% target	% background	p-value
	PAX5	2.27	0.63	1e-55
	REST-NRSF	0.61	0.06	1e-38
	M1BP	3.31	1.77	1e-24
	EBF1	7.49	5.77	1e-11
	AT2G15740	11.9	9.88	1e-10
